# Supplementary material for: Maternal Exposure to Aeroallergens and the Risk of Early Delivery
Source: PubMed Central journal article supplement (PMC5380107; doi:10.1097/ede.0000000000000573), 2016-11-30
Supplement: ede-28-107-s001.pdf [file ede-28-107-s001.pdf]

**eTable 1.** Dominant species/taxa for each type of aeroallergens.

| <b>Aeroallergens</b> | <b>Dominant species/taxa</b>                                                                                                                                                                                                                                                                                                                                                                                                   |                                                                                                                                                                                                                                                                                                                                                                                                                                                                      |
|----------------------|--------------------------------------------------------------------------------------------------------------------------------------------------------------------------------------------------------------------------------------------------------------------------------------------------------------------------------------------------------------------------------------------------------------------------------|----------------------------------------------------------------------------------------------------------------------------------------------------------------------------------------------------------------------------------------------------------------------------------------------------------------------------------------------------------------------------------------------------------------------------------------------------------------------|
| Weed pollen          | AMBROSIA (Ragweed)<br>ARTEMISIA (Sagebrush, Wormwood)<br>CHENOPODIACEAE, AMARANTHACEAE<br>CRUCIFERAE (Mustards)<br>HUMULUS, CANNABIS (Hops, Hemp)<br>LYTHRUM (Purple Loostripe)<br>Misc. Compositeae<br>Misc. Weeds<br>PLANTAGO (Plantain)<br>RUMEX (Dock, Rhubarb, Sorrel)<br>SALSOLA PESTIFER (Russian Thistle)<br>SOLIDAGO (Goldenrod)<br>TYPHA (Cattail)<br>UMBELLIFERAE (Wild Carrot)<br>URTICACEAE (Nettles & Pellitory) |                                                                                                                                                                                                                                                                                                                                                                                                                                                                      |
|                      | Tree pollen                                                                                                                                                                                                                                                                                                                                                                                                                    | CUPRESSACEAE (Cedar, Cypress, Juniper, Thuja)<br>LARIX (Larch, Tamarak, Pseudotsuga)<br>PINACEAE (Pine, Fir, Spruce)<br>TSUGA CANADENSIS/TSUGA HETEROPHYLLA (Hemlock)<br>ACER (Boxelder, Maple)<br>AESCULUS (Buckeye, Horse Chestnut)<br>ALNUS (Alder)<br>BETULA (Birch)<br>Birch look-a-likes (Hornbeam, Hop-Hornbeam)<br>CARYA (Hickory)<br>CASTANEA (Chestnut)<br>CELTIS (Hackberry)<br>CORYLUS (Hazelnut)<br>FAGUS (Beech)<br>FRAXINUS (Ash)<br>JUGLANS (Walnut) |

---

|              |                                                        |
|--------------|--------------------------------------------------------|
|              | MORUS (Mulberry)                                       |
|              | OLEACEAE (Ligustrum, Syringa)                          |
|              | PLATANUS (Sycamore)                                    |
|              | POPULUS (Aspen, Poplar)                                |
|              | PRUNUS, MALUS, CRATAEGUS (Apple, Plum, Pear, Hawthorn) |
|              | QUERCUS (Oak)                                          |
|              | SALIX (Willow)                                         |
|              | SAMBUCUS (Elderberry)                                  |
|              | TILIA (Basswood, Linden)                               |
|              | ULMUS (Elm)                                            |
| Grass pollen | CYPERACEAE (Sedge family)                              |
|              | GRAMINEAE (True Grasses)                               |
| Spores       | ASCOMYCETES                                            |
|              | BASIDIOMYCETES                                         |
|              | FUNGI IMPERFECTI                                       |
|              | MYXOMYCETES                                            |
|              | ZYGOMYCETES                                            |

---

**eTable 2.** Number of births by city, Ontario, Canada, April-October 2004-2011.

| <b>Location</b>    | <b>Number of births</b> |
|--------------------|-------------------------|
| All Sites Combined | 225,234                 |
| Toronto            | 125,294                 |
| Hamilton           | 36,634                  |
| London             | 25,068                  |
| Ottawa             | 16,020                  |
| Thunder Bay        | 4,839                   |
| Windsor            | 17,379                  |

**eTable 3.** Descriptive statistics of aeroallergens across each city during the week preceding birth, Ontario, Canada, April-October 2004-2011.

| <b>Aeroallergens</b>                                | <b>Toronto</b> | <b>Hamilton</b> | <b>London</b>   | <b>Ottawa</b> | <b>Thunder Bay</b> | <b>Windsor</b>  |
|-----------------------------------------------------|----------------|-----------------|-----------------|---------------|--------------------|-----------------|
| Total pollen (grains/m <sup>3</sup> )               |                |                 |                 |               |                    |                 |
| Median                                              | 55.9           | 51.4            | 51.2            | 71.4          | 30.3               | 68.3            |
| Interquartile range                                 | 126.0          | 188.7           | 160.6           | 171.1         | 103.3              | 157.5           |
| Minimum-maximum                                     | 0 – 3611.5     | 0 – 1780.4      | 0 – 1780.4      | 0 – 5002.0    | 0 – 3805.9         | 0 – 3991.3      |
| Grass pollen (grains/m <sup>3</sup> )               |                |                 |                 |               |                    |                 |
| Median                                              | 2.3            | 2.2             | 2.3             | 1.2           | 0.8                | 3.1             |
| Interquartile range                                 | 9.3            | 8.6             | 9.1             | 8.3           | 4.5                | 11.7            |
| Minimum-maximum                                     | 0 – 184.1      | 0 – 355.2       | 0 – 355.2       | 0 – 977       | 0 – 2170.8         | 0 – 319.4       |
| Tree pollen (grains/m <sup>3</sup> )                |                |                 |                 |               |                    |                 |
| Median                                              | 3.1            | 4.7             | 2.6             | 5.6           | 2.4                | 3.5             |
| Interquartile range                                 | 88.8           | 184.2           | 139.1           | 148.6         | 79.4               | 88.9            |
| Minimum-maximum                                     | 0 – 3611.5     | 0 – 1780.4      | 0 – 1780.4      | 0 – 5002.0    | 0 – 3805.9         | 0 – 3991.3      |
| Weed pollen (grains/m <sup>3</sup> )                |                |                 |                 |               |                    |                 |
| Median                                              | 7.5            | 4.4             | 5.9             | 5.9           | 2.0                | 11.0            |
| Interquartile range                                 | 22.3           | 16.4            | 19.4            | 31.8          | 9.0                | 33.9            |
| Minimum-maximum                                     | 0 – 755.3      | 0 – 319.6       | 0 – 381.8       | 0 – 613.6     | 0 – 210.9          | 0 – 1287.5      |
| Total spore concentrations (counts/m <sup>3</sup> ) |                |                 |                 |               |                    |                 |
| Median                                              | 2661.7         | 2560.9          | 2754.8          | 3843.5        | 4524.0             | 2679.8          |
| Interquartile range                                 | 3462.7         | 3,947           | 3612.0          | 4,953.1       | 6890.0             | 3422.8          |
| Minimum-maximum                                     | 0 – 47,424.9   | 11.1 – 27,870.5 | 11.1 – 27,870.5 | 0 – 30,469.9  | 3.7 – 108,241.1    | 18.7 – 39,265.2 |

**eTable 4.** Pearson correlation coefficients between aeroallergens variables, Ontario, Canada, April-October 2004-2011.

|         | Pollen | Weeds | Grasses | Trees  | Spores |
|---------|--------|-------|---------|--------|--------|
| Pollen  | 1      | 0.01  | 0.05    | 0.98   | - 0.17 |
| Weeds   |        | 1     | - 0.04  | - 0.17 | 0.25   |
| Grasses |        |       | 1       | -0.03  | 0.09   |
| Trees   |        |       |         | 1      | - 0.22 |
| Spores  |        |       |         |        | 1      |

**eTable 5.** Associations between exposure to aeroallergens and the risk of delivery across lagged days among preterm, early term and full term pregnancies, pooled across 6 cities in Ontario, Canada, April–October, 2004-2011.

| Aeroallergens             | Gestational age category             |                                         |                                        |
|---------------------------|--------------------------------------|-----------------------------------------|----------------------------------------|
|                           | Preterm<br>(HR 95% CIs) <sup>1</sup> | Early term<br>(HR 95% CIs) <sup>1</sup> | Full term<br>(HR 95% CIs) <sup>1</sup> |
| Total pollen (IQR: 132.6) |                                      |                                         |                                        |
| Lag 3                     | 0.99 (0.96, 1.03)                    | 0.98 (0.96, 1.00)                       | 1.00 (0.99, 1.01)                      |
| Lag 4                     | 1.00 (0.97, 1.03)                    | 0.97 (0.96, 0.99)                       | 0.99 (0.98, 1.00)                      |
| Lag 5                     | 1.00 (0.98, 1.03)                    | 0.98 (0.97, 0.99)                       | 0.99 (0.98, 0.99)                      |
| Lag 6                     | 1.01 (0.95, 1.06)                    | 0.99 (0.97, 1.02)                       | 0.99 (0.97, 1.01)                      |
| Grass pollen (IQR: 9.3)   |                                      |                                         |                                        |
| Lag 3                     | 0.99 (0.94, 1.05)                    | 0.98 (0.96, 1.01)                       | 0.99 (0.97, 1.01)                      |
| Lag 4                     | 0.99 (0.94, 1.05)                    | 0.99 (0.97, 1.02)                       | 0.99 (0.97, 1.01)                      |
| Lag 5                     | 0.99 (0.94, 1.05)                    | 0.98 (0.96, 1.01)                       | 0.99 (0.97, 1.01)                      |
| Lag 6                     | 0.99 (0.94, 1.05)                    | 0.98 (0.96, 1.01)                       | 0.99 (0.97, 1.01)                      |
| Tree pollen (IQR: 91.7)   |                                      |                                         |                                        |
| Lag 3                     | 1.02 (0.98, 1.07)                    | 1.00 (0.97, 1.03)                       | 1.01 (0.99, 1.02)                      |
| Lag 4                     | 1.01 (0.97, 1.06)                    | 1.00 (0.97, 1.03)                       | 1.00 (0.98, 1.03)                      |
| Lag 5                     | 1.00 (0.95, 1.06)                    | 1.00 (0.98, 1.03)                       | 1.00 (0.98, 1.02)                      |
| Lag 6                     | 1.00 (0.95, 1.06)                    | 1.00 (0.98, 1.03)                       | 1.00 (0.98, 1.02)                      |
| Weed pollen (IQR: 22.1)   |                                      |                                         |                                        |
| Lag 3                     | 1.00 (0.95, 1.06)                    | 1.02 (1.00, 1.04)                       | 1.02 (0.98, 1.02)                      |
| Lag 4                     | 1.00 (0.94, 1.07)                    | 1.02 (0.99, 1.04)                       | 1.01 (0.98, 1.02)                      |
| Lag 5                     | 1.00 (0.95, 1.06)                    | 1.01 (0.99, 1.03)                       | 1.00 (0.97, 1.02)                      |
| Lag 6                     | 1.00 (0.95, 1.06)                    | 0.99 (0.97, 1.03)                       | 1.00 (0.97, 1.03)                      |
| Spores (IQR: 3812.0)      |                                      |                                         |                                        |
| Lag 3                     | 0.94 (0.82, 1.07)                    | 1.02 (0.97, 1.09)                       | 1.07 (1.00, 1.11)                      |
| Lag 4                     | 0.95 (0.81, 1.08)                    | 1.02 (0.97, 1.09)                       | 1.03 (0.98, 1.08)                      |
| Lag 5                     | 0.95 (0.81, 1.09)                    | 1.01 (0.96, 1.09)                       | 1.02 (0.98, 1.07)                      |
| Lag 6                     | 0.95 (0.81, 1.09)                    | 1.00 (0.96, 1.10)                       | 1.02 (0.97, 1.06)                      |

1. Hazard ratios adjusted for maternal age at delivery, parity, smoking during pregnancy, dissemination-area (DA) median family income, percentage of the DA adult female population 25-64 years with a university degree, proportion of DA population who are visible minority, month/year of follow-up, ambient temperature, relative humidity, NO<sub>2</sub> and O<sub>3</sub>.

**eTable 6.** Cumulative effect over lag 0 to 2 days from exposure to aeroallergens on the risk of delivery among preterm, early term and full term pregnancies (N = 39,174), limited to a 5km buffer from aeroallergens stations, pooled across 6 cities in Ontario, Canada, April–October, 2004-2011.

| <b>Aeroallergens</b>        | <b>Gestational age category</b>             |                                                |                                               |
|-----------------------------|---------------------------------------------|------------------------------------------------|-----------------------------------------------|
|                             | <b>Preterm<br/>(HR 95% CIs)<sup>1</sup></b> | <b>Early term<br/>(HR 95% CIs)<sup>1</sup></b> | <b>Full term<br/>(HR 95% CIs)<sup>1</sup></b> |
| Total pollen (IQR: 132.6)   | 1.06 (0.95, 1.14)                           | 1.10 (0.94, 1.30)                              | 1.14 (0.93, 1.39)                             |
| Grass pollen (IQR: 9.3)     | 1.00 (0.92, 1.07)                           | 0.99 (0.97, 1.01)                              | 1.00 (0.97, 1.01)                             |
| Tree pollen (IQR: 91.7)     | 1.04 (0.96, 1.10)                           | 1.07 (0.95, 1.12)                              | 1.10 (0.94, 1.30)                             |
| Weed pollen (IQR: 22.1)     | 1.01 (0.92, 1.09)                           | 1.12 (0.95, 1.37)                              | 1.13 (0.94, 1.36)                             |
| Fungal spores (IQR: 3812.0) | 0.98 (0.81, 1.09)                           | 1.14 (0.93, 1.38)                              | 1.17 (0.91, 1.41)                             |

1. Hazard ratios adjusted for maternal age at delivery, parity, smoking during pregnancy, dissemination-area (DA) median family income, percentage of the DA adult female population 25-64 years with a university degree, proportion of DA population who are visible minority, month/year of follow-up, ambient temperature, relative humidity, NO2 and O3.



**eTable 7.** Cumulative effect over lag 0 to 2 days from exposure to aeroallergens on the risk of delivery among preterm, early term and full term pregnancies, across quintiles for each aeroallergens, pooled across 6 cities in Ontario, Canada, April–October, 2004–2011.

| Aeroallergens       | Gestational age category             |                                         |                                        |
|---------------------|--------------------------------------|-----------------------------------------|----------------------------------------|
|                     | Preterm<br>(HR 95% CIs) <sup>1</sup> | Early term<br>(HR 95% CIs) <sup>1</sup> | Full term<br>(HR 95% CIs) <sup>1</sup> |
| Total pollen        |                                      |                                         |                                        |
| Q1 (0 – 21.0)       | 1.0                                  | 1.0                                     | 1.0                                    |
| Q2 (21.0 – 42.1)    | 0.96 (0.72 – 1.29)                   | 1.07 (0.91 – 1.24)                      | 0.99 (0.89, 1.09)                      |
| Q3 (42.1 – 96.7)    | 1.04 (0.64 – 1.70)                   | 1.09 (0.87 – 1.38)                      | 1.01 (0.88, 1.16)                      |
| Q4 (96.7 – 224.3)   | 0.80 (0.50 – 1.30)                   | 1.21 (0.93 – 1.57)                      | 1.02 (0.88, 1.17)                      |
| Q5 (224.3 – 5002.0) | 1.23 (0.72 – 2.07)                   | 1.28 (1.01 – 1.63)                      | 1.22 (0.99, 1.52)                      |
| Grass pollen        |                                      |                                         |                                        |
| Q1 (0 – 0.3)        | 1.0                                  | 1.0                                     | 1.0                                    |
| Q2 (0.3 – 1.5)      | 0.99 (0.88, 1.10)                    | 0.98 (0.87, 1.11)                       | 0.99 (0.85, 1.13)                      |
| Q3 (1.5 – 3.6)      | 1.00 (0.89, 1.11)                    | 1.00 (0.88, 1.10)                       | 1.01 (0.87, 1.12)                      |
| Q4 (3.6 – 15.4)     | 1.01 (0.88, 1.13)                    | 0.99 (0.86, 1.13)                       | 0.99 (0.88, 1.11)                      |
| Q5 (15.4 – 2170.8)  | 0.98 (0.87, 1.14)                    | 0.99 (0.87, 1.11)                       | 0.98 (0.86, 1.14)                      |
| Tree pollen         |                                      |                                         |                                        |
| Q1 (0 – 1.5)        | 1.0                                  | 1.0                                     | 1.0                                    |
| Q2 (1.5 – 2.0)      | 1.01 (0.92, 1.16)                    | 1.00 (0.93, 1.14)                       | 1.00 (0.90, 1.15)                      |
| Q3 (2.0 – 9.4)      | 1.00 (0.90, 1.13)                    | 1.01 (0.91, 1.12)                       | 1.01 (0.92, 1.11)                      |
| Q4 (9.4 – 160.2)    | 1.01 (0.90, 1.14)                    | 1.00 (0.92, 1.17)                       | 0.99 (0.87, 1.19)                      |
| Q5 (160.2 – 5002.0) | 0.98 (0.88, 1.14)                    | 0.99 (0.86, 1.19)                       | 0.99 (0.88, 1.17)                      |
| Weed pollen         |                                      |                                         |                                        |
| Q1 (0 – 1.7)        | 1.0                                  | 1.0                                     | 1.0                                    |
| Q2 (1.7 – 5.4)      | 1.02 (0.80, 1.20)                    | 1.06 (0.93, 1.20)                       | 1.05 (0.97, 1.15)                      |
| Q3 (5.4 – 14.2)     | 1.04 (0.82, 1.19)                    | 1.11 (0.88, 1.35)                       | 1.13 (0.90, 1.33)                      |
| Q4 (14.2 – 34.2)    | 1.03 (0.90, 1.11)                    | 1.20 (0.95, 1.50)                       | 1.17 (0.98, 1.40)                      |
| Q5 (34.2 – 1287.5)  | 1.01 (0.78, 1.25)                    | 1.34 (1.03, 1.70)                       | 1.32 (1.02, 1.60)                      |
| Fungal spores       |                                      |                                         |                                        |
| Q1 (0 – 863.2)      | 1.0                                  | 1.0                                     | 1.0                                    |
| Q2 (863.2 – 2330.2) | 0.80 (0.42 – 1.53)                   | 0.97 (0.68 – 1.37)                      | 0.97 (0.79, 1.19)                      |

|                         |                    |                    |                   |
|-------------------------|--------------------|--------------------|-------------------|
| Q3 (2330.2 – 3687.6)    | 0.73 (0.37 – 1.47) | 1.14 (0.81 – 1.61) | 1.16 (0.90, 1.31) |
| Q4 (3687.6 – 5327.0)    | 0.84 (0.42 – 1.68) | 1.28 (0.95 – 1.72) | 1.27 (0.95, 1.72) |
| Q5 (5327.0 – 108,241.1) | 1.04 (0.57 – 1.90) | 1.30 (0.94 – 1.82) | 1.35 (1.02, 1.70) |

- 
1. Hazard ratios adjusted for maternal age at delivery, parity, smoking during pregnancy, dissemination-area (DA) median family income, percentage of the DA adult female population 25-64 years with a university degree, proportion of DA population who are visible minority, month/year of follow-up, ambient temperature, relative humidity, NO2 and O3.

**eFigure 1.** Associations<sup>1</sup> between ambient weed pollen concentrations cumulated over lag 0 to 2 days and risk of delivery among early term pregnancies, per IQR (22.1), for each city and pooled across 6 cities in Ontario, Canada, April–October, 2004-2011.

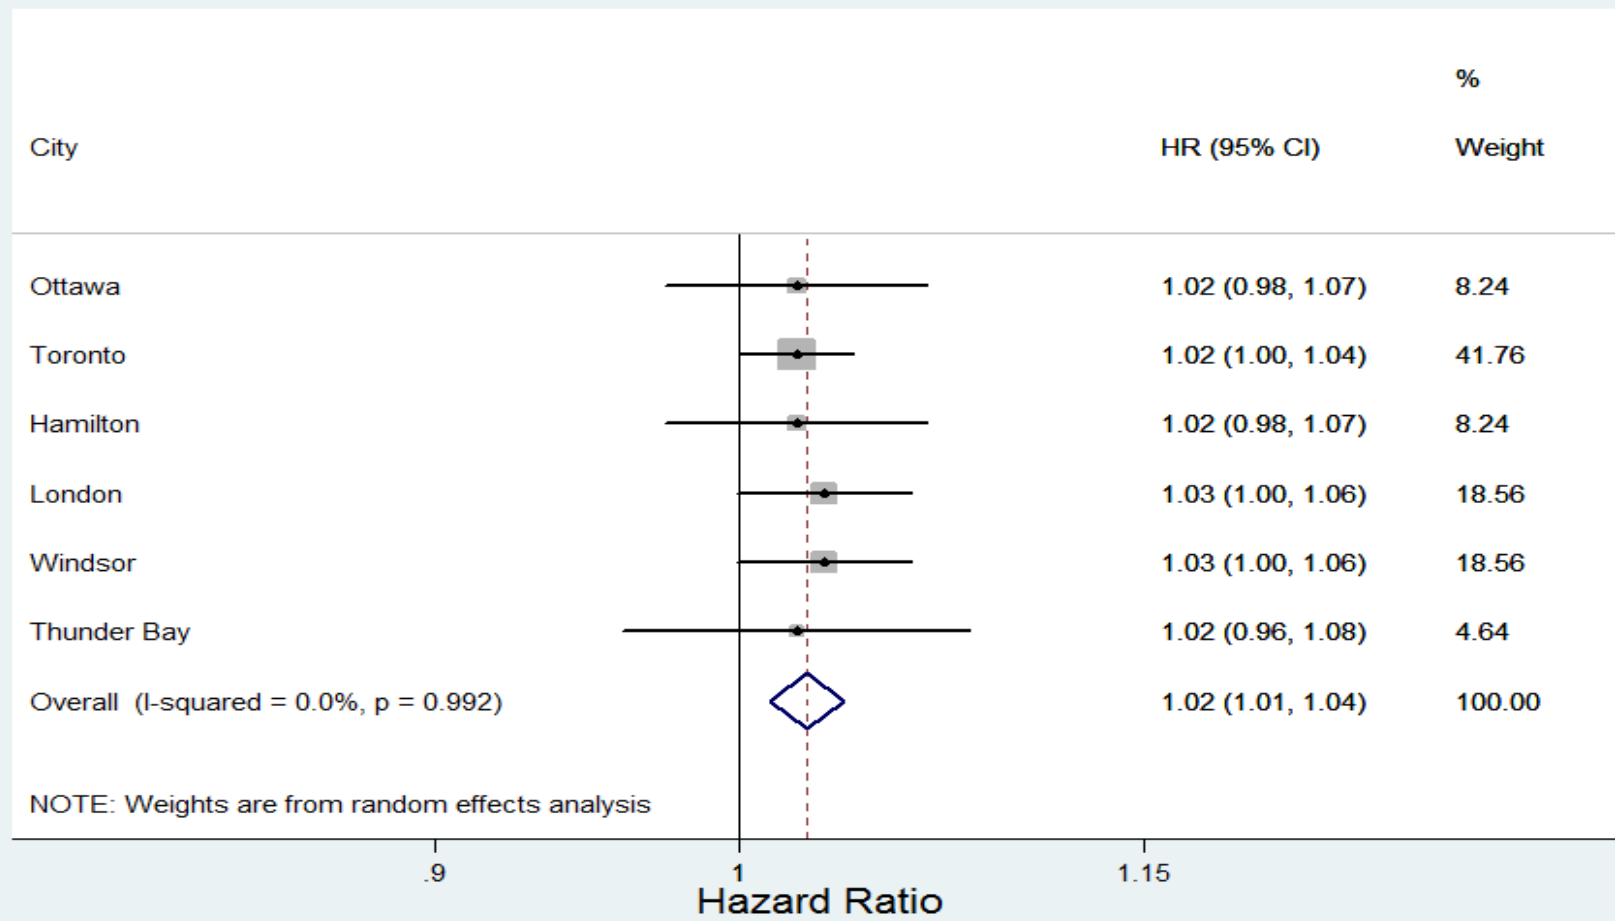

1. Hazard ratios adjusted for maternal age at delivery, parity, smoking during pregnancy, dissemination-area (DA) median family income, percentage of the DA adult female population 25-64 years with a university degree, proportion of DA population who are visible minority, month/year of follow-up, ambient temperature, relative humidity, NO<sub>2</sub> and O<sub>3</sub>.
